# Supplementary material
Source: publisher figshare collection journal article supplement (https://acs.figshare.com/ndownloader/files/4442626)
Supplement: Supplementary file 1 [file 4442626]

 
data_c:\Cao18(280K) 
 
_audit_creation_method            SHELXL-97 
_chemical_name_systematic 
; 
 1,1,6,6-tetraphenyl-2,4-hexadiyne-1,6-diol : 2(1,4-dimethyl-2-pyridinone)  
; 
_chemical_name_common             ? 
_chemical_melting_point           ? 
_chemical_formula_moiety          'C30 H22 O2 : 2(C7 H9 N O)' 
_chemical_formula_sum 
 'C44 H40 N2 O4' 
_chemical_formula_weight          660.78 
 
loop_ 
 _atom_type_symbol 
 _atom_type_description 
 _atom_type_scat_dispersion_real 
 _atom_type_scat_dispersion_imag 
 _atom_type_scat_source 
 'C'  'C'   0.0033   0.0016 
 'International Tables Vol C Tables 4.2.6.8 and 6.1.1.4' 
 'O'  'O'   0.0106   0.0060 
 'International Tables Vol C Tables 4.2.6.8 and 6.1.1.4' 
 'N'  'N'   0.0061   0.0033 
 'International Tables Vol C Tables 4.2.6.8 and 6.1.1.4' 
 'H'  'H'   0.0000   0.0000 
 'International Tables Vol C Tables 4.2.6.8 and 6.1.1.4' 
 
_symmetry_cell_setting            triclinic 
_symmetry_space_group_name_H-M    P-1 
 
loop_ 
 _symmetry_equiv_pos_as_xyz 
 'x, y, z' 
 '-x, -y, -z' 
 
_cell_length_a                    8.4124(7) 
_cell_length_b                    10.7275(10) 
_cell_length_c                    11.4652(10) 
_cell_angle_alpha                 67.875(2) 
_cell_angle_beta                  84.032(2) 
_cell_angle_gamma                 67.981(2) 
_cell_volume                      887.73(14) 
_cell_formula_units_Z             1 
_cell_measurement_temperature     280(2) 
_cell_measurement_reflns_used     1943 
_cell_measurement_theta_min       2.22 
_cell_measurement_theta_max       26.11 
 
_exptl_crystal_description        prism 
_exptl_crystal_colour             colorless 
_exptl_crystal_size_max           0.2 
_exptl_crystal_size_mid           0.2 
_exptl_crystal_size_min           0.2 
_exptl_crystal_density_meas       ? 
_exptl_crystal_density_diffrn     1.236 
_exptl_crystal_density_method     'not measured' 
_exptl_crystal_F_000              350 
_exptl_absorpt_coefficient_mu     0.079 
_exptl_absorpt_correction_type    none 
_exptl_absorpt_correction_T_min   ? 
_exptl_absorpt_correction_T_max   ? 
_exptl_absorpt_process_details    ? 
 
_exptl_special_details 
; 
 ? 
; 
 
_diffrn_ambient_temperature       280(2) 
_diffrn_radiation_wavelength      0.71073 
_diffrn_radiation_type           'MoK\a'
_diffrn_radiation_source         'sealed tube'
_diffrn_radiation_monochromator  'graphite'
_diffrn_measurement_device_type  'Bruker APEX-II CCD'
_diffrn_measurement_method       '\f and \w scans'
_diffrn_detector_area_resol_mean  ? 
_diffrn_standards_number          0 
_diffrn_standards_interval_count  ? 
_diffrn_standards_interval_time   ? 
_diffrn_standards_decay_%         ? 
_diffrn_reflns_number             8439 
_diffrn_reflns_av_R_equivalents   0.0260 
_diffrn_reflns_av_sigmaI/netI     0.0431 
_diffrn_reflns_limit_h_min        -11 
_diffrn_reflns_limit_h_max        9 
_diffrn_reflns_limit_k_min        -14 
_diffrn_reflns_limit_k_max        14 
_diffrn_reflns_limit_l_min        -10 
_diffrn_reflns_limit_l_max        15 
_diffrn_reflns_theta_min          1.92 
_diffrn_reflns_theta_max          28.36 
_reflns_number_total              4421 
_reflns_number_gt                 2670 
_reflns_threshold_expression      >2sigma(I) 
 
_computing_data_collection      'Bruker APEX2'
_computing_cell_refinement      'Bruker SAINT'
_computing_data_reduction       'Bruker SAINT'
_computing_structure_solution     'SHELXS-97 (Sheldrick, 1990)' 
_computing_structure_refinement   'SHELXL-97 (Sheldrick, 1997)' 
_computing_molecular_graphics     ? 
_computing_publication_material   ? 
 
_refine_special_details 
; 
 Refinement of F^2^ against ALL reflections.  The weighted R-factor wR and 
 goodness of fit S are based on F^2^, conventional R-factors R are based 
 on F, with F set to zero for negative F^2^. The threshold expression of 
 F^2^ > 2sigma(F^2^) is used only for calculating R-factors(gt) etc. and is 
 not relevant to the choice of reflections for refinement.  R-factors based 
 on F^2^ are statistically about twice as large as those based on F, and R- 
 factors based on ALL data will be even larger. 
; 
 
_refine_ls_structure_factor_coef  Fsqd  
_refine_ls_matrix_type            full 
_refine_ls_weighting_scheme       calc  
_refine_ls_weighting_details 
 'calc w=1/[\s^2^(Fo^2^)+(0.0593P)^2^+0.0460P] where P=(Fo^2^+2Fc^2^)/3' 
_atom_sites_solution_primary      direct 
_atom_sites_solution_secondary    difmap 
_atom_sites_solution_hydrogens    geom 
_refine_ls_hydrogen_treatment     mixed
_refine_ls_extinction_method      SHELXL 
_refine_ls_extinction_coef        0.029(4) 
_refine_ls_extinction_expression 
 'Fc^*^=kFc[1+0.001xFc^2^\l^3^/sin(2\q)]^-1/4^' 
_refine_ls_number_reflns          4421 
_refine_ls_number_parameters      232 
_refine_ls_number_restraints      0 
_refine_ls_R_factor_all           0.0833 
_refine_ls_R_factor_gt            0.0438 
_refine_ls_wR_factor_ref          0.1301 
_refine_ls_wR_factor_gt           0.1089 
_refine_ls_goodness_of_fit_ref    1.001 
_refine_ls_restrained_S_all       1.001 
_refine_ls_shift/su_max           0.007 
_refine_ls_shift/su_mean          0.000 
 
loop_ 
 _atom_site_label 
 _atom_site_type_symbol 
 _atom_site_fract_x 
 _atom_site_fract_y 
 _atom_site_fract_z 
 _atom_site_U_iso_or_equiv 
 _atom_site_adp_type 
 _atom_site_occupancy 
 _atom_site_symmetry_multiplicity 
 _atom_site_calc_flag 
 _atom_site_refinement_flags 
 _atom_site_disorder_assembly 
 _atom_site_disorder_group 
O1 O 0.63609(14) 0.73968(12) -0.33375(9) 0.0471(3) Uani 1 1 d . . . 
H1 H 0.705(2) 0.650(2) -0.3177(15) 0.056 Uiso 1 1 d . . . 
C1 C 0.52662(18) 0.55241(14) -0.04351(13) 0.0383(3) Uani 1 1 d . . . 
C2 C 0.57292(17) 0.64294(14) -0.11906(13) 0.0380(3) Uani 1 1 d . . . 
C3 C 0.62013(17) 0.75937(14) -0.21677(12) 0.0347(3) Uani 1 1 d . . . 
C4 C 0.78527(17) 0.76621(14) -0.17986(13) 0.0380(3) Uani 1 1 d . . . 
C5 C 0.86473(19) 0.68866(17) -0.06109(15) 0.0469(4) Uani 1 1 d . . . 
H5 H 0.8213 0.6244 -0.0007 0.056 Uiso 1 1 calc R . . 
C6 C 1.0093(2) 0.7063(2) -0.03138(19) 0.0645(5) Uani 1 1 d . . . 
H6 H 1.0622 0.6543 0.0487 0.077 Uiso 1 1 calc R . . 
C7 C 1.0732(2) 0.8005(2) -0.1206(2) 0.0773(6) Uani 1 1 d . . . 
H7 H 1.1692 0.8131 -0.1007 0.093 Uiso 1 1 calc R . . 
C8 C 0.9965(3) 0.8765(2) -0.2390(2) 0.0810(6) Uani 1 1 d . . . 
H8 H 1.0409 0.9402 -0.2992 0.097 Uiso 1 1 calc R . . 
C9 C 0.8540(2) 0.85911(19) -0.26912(17) 0.0608(5) Uani 1 1 d . . . 
H9 H 0.8036 0.9101 -0.3500 0.073 Uiso 1 1 calc R . . 
C10 C 0.47313(17) 0.90318(14) -0.23253(12) 0.0361(3) Uani 1 1 d . . . 
C11 C 0.3820(2) 0.99138(16) -0.34574(14) 0.0460(4) Uani 1 1 d . . . 
H11 H 0.4100 0.9641 -0.4154 0.055 Uiso 1 1 calc R . . 
C12 C 0.2491(2) 1.12033(18) -0.35619(16) 0.0588(4) Uani 1 1 d . . . 
H12 H 0.1897 1.1798 -0.4332 0.071 Uiso 1 1 calc R . . 
C13 C 0.2047(2) 1.16064(18) -0.25355(18) 0.0599(5) Uani 1 1 d . . . 
H13 H 0.1145 1.2465 -0.2604 0.072 Uiso 1 1 calc R . . 
C14 C 0.2951(2) 1.07280(18) -0.13992(17) 0.0582(4) Uani 1 1 d . . . 
H14 H 0.2655 1.0995 -0.0700 0.070 Uiso 1 1 calc R . . 
C15 C 0.4287(2) 0.94597(17) -0.12992(14) 0.0469(4) Uani 1 1 d . . . 
H15 H 0.4900 0.8882 -0.0534 0.056 Uiso 1 1 calc R . . 
O2 O 0.18891(17) 0.54615(12) 0.29525(11) 0.0684(4) Uani 1 1 d . . . 
N1 N 0.29170(19) 0.69846(16) 0.32708(14) 0.0604(4) Uani 1 1 d . . . 
C16 C 0.2290(2) 0.58858(17) 0.37177(16) 0.0510(4) Uani 1 1 d . . . 
C17 C 0.2117(2) 0.53389(18) 0.50356(16) 0.0574(4) Uani 1 1 d . . . 
H17 H 0.1667 0.4612 0.5369 0.069 Uiso 1 1 calc R . . 
C18 C 0.2570(2) 0.58152(19) 0.58374(16) 0.0618(5) Uani 1 1 d . . . 
C19 C 0.3267(3) 0.6904(2) 0.5320(2) 0.0738(6) Uani 1 1 d . . . 
H19 H 0.3623 0.7243 0.5842 0.089 Uiso 1 1 calc R . . 
C20 C 0.3416(3) 0.7452(2) 0.4067(2) 0.0763(6) Uani 1 1 d . . . 
H20 H 0.3874 0.8174 0.3735 0.092 Uiso 1 1 calc R . . 
C21 C 0.3023(3) 0.7662(3) 0.19021(19) 0.0965(7) Uani 1 1 d . . . 
H21A H 0.1888 0.8235 0.1525 0.145 Uiso 1 1 calc R . . 
H21B H 0.3568 0.6925 0.1554 0.145 Uiso 1 1 calc R . . 
H21C H 0.3682 0.8268 0.1732 0.145 Uiso 1 1 calc R . . 
C22 C 0.2360(4) 0.5204(3) 0.72344(18) 0.0998(8) Uani 1 1 d . . . 
H22A H 0.2637 0.4181 0.7502 0.150 Uiso 1 1 calc R . . 
H22B H 0.1194 0.5656 0.7422 0.150 Uiso 1 1 calc R . . 
H22C H 0.3115 0.5385 0.7670 0.150 Uiso 1 1 calc R . . 
 
loop_ 
 _atom_site_aniso_label 
 _atom_site_aniso_U_11 
 _atom_site_aniso_U_22 
 _atom_site_aniso_U_33 
 _atom_site_aniso_U_23 
 _atom_site_aniso_U_13 
 _atom_site_aniso_U_12 
O1 0.0611(7) 0.0422(6) 0.0423(6) -0.0198(5) 0.0042(5) -0.0196(5) 
C1 0.0374(8) 0.0339(7) 0.0462(8) -0.0146(6) 0.0036(6) -0.0161(6) 
C2 0.0383(8) 0.0339(7) 0.0442(7) -0.0140(6) 0.0029(6) -0.0162(6) 
C3 0.0387(7) 0.0330(7) 0.0353(7) -0.0120(5) 0.0044(5) -0.0174(6) 
C4 0.0352(8) 0.0327(7) 0.0496(8) -0.0182(6) 0.0067(6) -0.0141(6) 
C5 0.0418(9) 0.0481(9) 0.0558(9) -0.0250(7) 0.0027(7) -0.0157(7) 
C6 0.0439(10) 0.0739(13) 0.0876(13) -0.0489(11) -0.0092(9) -0.0116(9) 
C7 0.0398(10) 0.0768(14) 0.140(2) -0.0616(14) 0.0042(11) -0.0262(10) 
C8 0.0562(12) 0.0714(13) 0.1240(18) -0.0273(13) 0.0135(12) -0.0434(11) 
C9 0.0532(10) 0.0538(10) 0.0742(11) -0.0116(8) 0.0068(8) -0.0314(9) 
C10 0.0367(8) 0.0321(7) 0.0422(7) -0.0112(6) 0.0041(6) -0.0186(6) 
C11 0.0477(9) 0.0425(8) 0.0445(8) -0.0086(6) 0.0011(6) -0.0197(7) 
C12 0.0541(10) 0.0436(9) 0.0625(10) -0.0018(8) -0.0084(8) -0.0155(8) 
C13 0.0469(10) 0.0386(9) 0.0858(13) -0.0192(9) 0.0003(9) -0.0098(8) 
C14 0.0552(10) 0.0524(10) 0.0737(11) -0.0355(9) 0.0093(8) -0.0160(8) 
C15 0.0479(9) 0.0429(8) 0.0506(8) -0.0198(7) -0.0003(7) -0.0142(7) 
O2 0.0857(9) 0.0538(7) 0.0702(8) -0.0343(6) -0.0133(6) -0.0144(7) 
N1 0.0620(9) 0.0576(9) 0.0687(9) -0.0303(7) 0.0096(7) -0.0240(8) 
C16 0.0502(9) 0.0391(8) 0.0629(10) -0.0254(8) -0.0072(7) -0.0061(7) 
C17 0.0732(12) 0.0415(9) 0.0588(10) -0.0179(7) -0.0068(8) -0.0204(9) 
C18 0.0696(12) 0.0469(10) 0.0645(11) -0.0258(8) -0.0132(9) -0.0071(9) 
C19 0.0770(14) 0.0711(13) 0.0916(15) -0.0456(12) -0.0172(11) -0.0250(11) 
C20 0.0747(14) 0.0746(14) 0.1026(16) -0.0436(12) 0.0073(11) -0.0415(12) 
C21 0.120(2) 0.0958(18) 0.0765(14) -0.0295(13) 0.0311(13) -0.0514(16) 
C22 0.147(2) 0.0804(16) 0.0628(13) -0.0287(11) -0.0160(13) -0.0243(16) 
 
_geom_special_details 
; 
 All esds (except the esd in the dihedral angle between two l.s. planes) 
 are estimated using the full covariance matrix.  The cell esds are taken 
 into account individually in the estimation of esds in distances, angles 
 and torsion angles; correlations between esds in cell parameters are only 
 used when they are defined by crystal symmetry.  An approximate (isotropic) 
 treatment of cell esds is used for estimating esds involving l.s. planes. 
; 
 
loop_ 
 _geom_bond_atom_site_label_1 
 _geom_bond_atom_site_label_2 
 _geom_bond_distance 
 _geom_bond_site_symmetry_2 
 _geom_bond_publ_flag 
O1 C3 1.4199(15) . ? 
O1 H1 0.872(18) . ? 
C1 C2 1.1938(18) . ? 
C1 C1 1.378(3) 2_665 ? 
C2 C3 1.4826(18) . ? 
C3 C4 1.5286(19) . ? 
C3 C10 1.5323(19) . ? 
C4 C5 1.383(2) . ? 
C4 C9 1.384(2) . ? 
C5 C6 1.393(2) . ? 
C5 H5 0.9300 . ? 
C6 C7 1.368(3) . ? 
C6 H6 0.9300 . ? 
C7 C8 1.371(3) . ? 
C7 H7 0.9300 . ? 
C8 C9 1.376(2) . ? 
C8 H8 0.9300 . ? 
C9 H9 0.9300 . ? 
C10 C11 1.3803(19) . ? 
C10 C15 1.3861(19) . ? 
C11 C12 1.386(2) . ? 
C11 H11 0.9300 . ? 
C12 C13 1.372(2) . ? 
C12 H12 0.9300 . ? 
C13 C14 1.381(2) . ? 
C13 H13 0.9300 . ? 
C14 C15 1.375(2) . ? 
C14 H14 0.9300 . ? 
C15 H15 0.9300 . ? 
O2 C16 1.2522(17) . ? 
N1 C20 1.358(2) . ? 
N1 C16 1.373(2) . ? 
N1 C21 1.469(2) . ? 
C16 C17 1.414(2) . ? 
C17 C18 1.351(2) . ? 
C17 H17 0.9300 . ? 
C18 C19 1.406(3) . ? 
C18 C22 1.505(3) . ? 
C19 C20 1.344(3) . ? 
C19 H19 0.9300 . ? 
C20 H20 0.9300 . ? 
C21 H21A 0.9600 . ? 
C21 H21B 0.9600 . ? 
C21 H21C 0.9600 . ? 
C22 H22A 0.9600 . ? 
C22 H22B 0.9600 . ? 
C22 H22C 0.9600 . ? 
 
loop_ 
 _geom_angle_atom_site_label_1 
 _geom_angle_atom_site_label_2 
 _geom_angle_atom_site_label_3 
 _geom_angle 
 _geom_angle_site_symmetry_1 
 _geom_angle_site_symmetry_3 
 _geom_angle_publ_flag 
C3 O1 H1 105.5(10) . . ? 
C2 C1 C1 179.8(2) . 2_665 ? 
C1 C2 C3 176.56(15) . . ? 
O1 C3 C2 109.73(10) . . ? 
O1 C3 C4 110.54(11) . . ? 
C2 C3 C4 112.15(11) . . ? 
O1 C3 C10 107.91(11) . . ? 
C2 C3 C10 107.67(11) . . ? 
C4 C3 C10 108.70(10) . . ? 
C5 C4 C9 118.87(14) . . ? 
C5 C4 C3 123.29(12) . . ? 
C9 C4 C3 117.80(13) . . ? 
C4 C5 C6 120.38(16) . . ? 
C4 C5 H5 119.8 . . ? 
C6 C5 H5 119.8 . . ? 
C7 C6 C5 119.66(18) . . ? 
C7 C6 H6 120.2 . . ? 
C5 C6 H6 120.2 . . ? 
C6 C7 C8 120.34(17) . . ? 
C6 C7 H7 119.8 . . ? 
C8 C7 H7 119.8 . . ? 
C7 C8 C9 120.29(18) . . ? 
C7 C8 H8 119.9 . . ? 
C9 C8 H8 119.9 . . ? 
C8 C9 C4 120.44(17) . . ? 
C8 C9 H9 119.8 . . ? 
C4 C9 H9 119.8 . . ? 
C11 C10 C15 118.72(14) . . ? 
C11 C10 C3 122.06(12) . . ? 
C15 C10 C3 119.22(12) . . ? 
C10 C11 C12 120.42(15) . . ? 
C10 C11 H11 119.8 . . ? 
C12 C11 H11 119.8 . . ? 
C13 C12 C11 120.35(15) . . ? 
C13 C12 H12 119.8 . . ? 
C11 C12 H12 119.8 . . ? 
C12 C13 C14 119.54(16) . . ? 
C12 C13 H13 120.2 . . ? 
C14 C13 H13 120.2 . . ? 
C15 C14 C13 120.17(16) . . ? 
C15 C14 H14 119.9 . . ? 
C13 C14 H14 119.9 . . ? 
C14 C15 C10 120.79(15) . . ? 
C14 C15 H15 119.6 . . ? 
C10 C15 H15 119.6 . . ? 
C20 N1 C16 121.20(16) . . ? 
C20 N1 C21 120.29(18) . . ? 
C16 N1 C21 118.51(15) . . ? 
O2 C16 N1 119.08(15) . . ? 
O2 C16 C17 125.00(16) . . ? 
N1 C16 C17 115.91(14) . . ? 
C18 C17 C16 123.56(17) . . ? 
C18 C17 H17 118.2 . . ? 
C16 C17 H17 118.2 . . ? 
C17 C18 C19 117.46(17) . . ? 
C17 C18 C22 121.77(19) . . ? 
C19 C18 C22 120.77(17) . . ? 
C20 C19 C18 119.80(16) . . ? 
C20 C19 H19 120.1 . . ? 
C18 C19 H19 120.1 . . ? 
C19 C20 N1 121.99(18) . . ? 
C19 C20 H20 119.0 . . ? 
N1 C20 H20 119.0 . . ? 
N1 C21 H21A 109.5 . . ? 
N1 C21 H21B 109.5 . . ? 
H21A C21 H21B 109.5 . . ? 
N1 C21 H21C 109.5 . . ? 
H21A C21 H21C 109.5 . . ? 
H21B C21 H21C 109.5 . . ? 
C18 C22 H22A 109.5 . . ? 
C18 C22 H22B 109.5 . . ? 
H22A C22 H22B 109.5 . . ? 
C18 C22 H22C 109.5 . . ? 
H22A C22 H22C 109.5 . . ? 
H22B C22 H22C 109.5 . . ? 
 
_diffrn_measured_fraction_theta_max    0.993 
_diffrn_reflns_theta_full              28.36 
_diffrn_measured_fraction_theta_full   0.993 
_refine_diff_density_max    0.169 
_refine_diff_density_min   -0.134 
_refine_diff_density_rms    0.035 
